# Supplementary material for: Influence of pseudo-Jahn–Teller activity on the singlet–triplet gap of azaphenalenes
Source: Royal Society of Chemistry journal article supplement (doi:10.1039/d4cp02761b), 2024-01-01
Supplement: d4cp02761b1.pdf [file d4cp02761b1.pdf]

*Supplementary information for:*

# **Influence of Pseudo-Jahn–Teller Activity on the Singlet-Triplet Gap of Azaphenalenenes**

Atreyee Majumdar, Komal Jindal, Surajit Das, and Raghunathan Ramakrishnan\*

*Tata Institute of Fundamental Research, Hyderabad 500046, India*

E-mail: ramakrishnan@tifrh.res.in

Table S1: **Results for 1AP:** Energies of the  $S_1$  and  $T_1$  states with respect to the  $S_0$  ground state along with the singlet-triplet gap,  $S_1$ - $T_1$ , are given in eV. Methods used for determining the equilibrium geometries and their point groups are also stated. The barrier for automerization,  $E^\ddagger$ , determined with the method used for optimization is stated in kJ/mol. Results from other studies are included for comparison.

| Geometry        |                  |              | Excited states |       |       |               | Source              |
|-----------------|------------------|--------------|----------------|-------|-------|---------------|---------------------|
| Method          | Symmetry         | $E^\ddagger$ | Method         | $S_1$ | $T_1$ | $S_1$ - $T_1$ |                     |
| B3LYP           | $D_{3h}, C_{3h}$ | 0.0          | ADC(2)         | 1.004 | 1.146 | -0.143        | this work           |
| $\omega$ B97X-D | $D_{3h}, C_{3h}$ | 0.0          | "              | 1.027 | 1.166 | -0.139        | "                   |
| MP2             | $D_{3h}, C_{3h}$ | 0.0          | "              | 0.997 | 1.138 | -0.141        | "                   |
| CCSD            | $D_{3h}$         | 3.6          | "              | 1.012 | 1.153 | -0.142        | "                   |
| "               | $C_{3h}$         |              | "              | 1.391 | 1.334 | +0.057        | "                   |
| CCSD(T)         | $D_{3h}$         | 0.5          | "              | 0.988 | 1.134 | -0.146        | "                   |
| "               | $C_{3h}$         |              | "              | 1.143 | 1.204 | -0.061        | "                   |
| B97-3C          |                  |              | NEVPT2(12,12)  | 1.244 | 1.288 | -0.044        | Ref. 1              |
|                 |                  |              | RMS-CASPT2     | 0.89  | 0.97  | -0.08         | Ref. 2              |
| MP2             |                  |              | CC2            | 1.047 | 1.180 | -0.133        | Ref. 3              |
| MP2,ADC(2)      |                  |              | CC2(adiabatic) | 0.976 | 1.117 | -0.141        | Ref. 3              |
| MP2,ADC(2)      |                  |              | CC2 (0-0)      | 0.992 | 1.068 | -0.076        | Ref. 3              |
| $\omega$ B97X-D |                  |              | EOM-CCSD       |       |       | -0.072        | Ref. 4              |
| CCSD(T)         | $D_{3h}$         |              | ADC(2)         | 1.001 | 1.138 | -0.137        | Ref. 5              |
| CCSD(T)         | $D_{3h}$         |              | ADC(3)         | 0.81  | 0.87  | -0.06         | Ref. 5              |
| CCSD(T)         | $D_{3h}$         |              | TBE            | 0.979 | 1.110 | -0.131        | Ref. 5              |
| exp.            |                  |              | exp.           | 0.97  | 0.93  | +0.04         | Ref. 6 <sup>a</sup> |

<sup>a</sup> Using  $S_1=0.78 \mu\text{m}^{-1}$  and  $T_1=0.75 \mu\text{m}^{-1}$  from Ref. 6 multiplied by  $1.2398 \text{ eV}/\mu\text{m}^{-1}$ .

Table S2: **Results for 5AP:** Energies of the  $S_1$  and  $T_1$  states with respect to the  $S_0$  ground state along with the singlet-triplet gap,  $S_1$ - $T_1$ , are given in eV. Methods used for determining the equilibrium geometries and their point groups are also stated. The barrier for automerization,  $E^\ddagger$ , determined with the method used for optimization is stated in kJ/mol. Results from other studies are included for comparison.

| Geometry        |               |              | Excited states  |       |       | Source        |           |
|-----------------|---------------|--------------|-----------------|-------|-------|---------------|-----------|
| Method          | Symmetry      | $E^\ddagger$ | Method          | $S_1$ | $T_1$ | $S_1$ - $T_1$ |           |
| B3LYP           | $C_{2v}, C_s$ | 0.0          | ADC(2)          | 2.129 | 2.275 | -0.146        | this work |
| $\omega$ B97X-D | $C_{2v}, C_s$ | 0.0          | "               | 2.167 | 2.307 | -0.140        | "         |
| MP2             | $C_{2v}$      |              | "               | 2.143 | 2.288 | -0.145        | "         |
| CCSD            | $C_{2v}$      |              | "               | 2.161 | 2.303 | -0.142        | "         |
| CCSD(T)         | $C_{2v}$      |              | "               | 2.123 | 2.273 | -0.150        | "         |
| B97-3C          |               |              | NEVPT2(8,8)     | 2.26  | 2.35  | -0.089        | Ref. 1    |
| B97-3C          |               |              | NEVPT2(10,10)   |       |       | +0.034        | Ref. 1    |
| B97-3C          |               |              | NEVPT2(12,12)   |       |       | +0.036        | Ref. 1    |
|                 |               |              | RMS-CASPT2      | 2.00  | 2.08  | -0.08         | Ref. 2    |
| MP2             |               |              | CC2             | 2.231 | 2.365 | -0.134        | Ref. 3    |
| MP2, ADC(2)     |               |              | CC2 (adiabatic) | 2.066 | 2.197 | -0.131        | Ref. 3    |
| MP2, ADC(2)     |               |              | CC2 (0-0)       | 1.971 | 2.056 | -0.085        | Ref. 3    |
| $\omega$ B97X-D |               |              | EOM-CCSD        | 2.359 | 2.397 | -0.08         | Ref. 7    |
| CCSD(T)         | $C_{2v}$      |              | ADC(2)          | 2.159 | 2.298 | -0.139        | Ref. 5    |
| CCSD(T)         | $C_{2v}$      |              | TBE             | 2.177 | 2.296 | -0.119        | Ref. 5    |
| exp.            |               |              | exp.            | 1.957 | 2.003 | -0.047        | Ref. 8    |

Table S3: **Results for 7AP:** Energies of the  $S_1$  and  $T_1$  states with respect to the  $S_0$  ground state along with the singlet-triplet gap,  $S_1$ - $T_1$ , are given in eV. Methods used for determining the equilibrium geometries and their point groups are also stated. The barrier for automerization,  $E^\ddagger$ , determined with the method used for optimization is stated in kJ/mol. Results from other studies are included for comparison.

| Geometry        |                  |              | Excited states  |       |       |               | Source    |
|-----------------|------------------|--------------|-----------------|-------|-------|---------------|-----------|
| Method          | Symmetry         | $E^\ddagger$ | Method          | $S_1$ | $T_1$ | $S_1$ - $T_1$ |           |
| B3LYP           | $D_{3h}, C_{3h}$ | 0.0          | ADC(2)          | 2.643 | 2.892 | -0.249        | this work |
| $\omega$ B97X-D | $D_{3h}, C_{3h}$ | 0.0          | "               | 2.681 | 2.925 | -0.244        | "         |
| MP2             | $D_{3h}$         |              | "               | 2.649 | 2.900 | -0.251        | "         |
| CCSD            | $D_{3h}$         |              | "               | 2.670 | 2.918 | -0.249        | "         |
| CCSD(T)         | $D_{3h}$         |              | "               | 2.626 | 2.882 | -0.256        | "         |
| B97-3C          |                  |              | NEVPT2(12,12)   | 3.259 | 3.398 | -0.139        | Ref. 1    |
|                 |                  |              | RMS-CASPT2      | 2.50  | 2.70  | -0.20         | Ref. 2    |
| MP2             |                  |              | CC2             | 2.756 | 2.998 | -0.242        | Ref. 3    |
| MP2, ADC(2)     |                  |              | CC2 (adiabatic) | 2.640 | 2.894 | -0.254        | Ref. 3    |
| MP2, ADC(2)     |                  |              | CC2 (0-0)       | 2.512 | 2.618 | -0.106        | Ref. 3    |
| $\omega$ B97X-D |                  |              | EOM-CCSD        |       |       | -0.144        | Ref. 4    |
| CCSD(T)         | $D_{3h}$         |              | ADC(2)          | 2.675 | 2.927 | -0.246        | Ref. 5    |
| CCSD(T)         | $D_{3h}$         |              | ADC(3)          | 2.81  | 2.88  | -0.07         | Ref. 5    |
| CCSD(T)         | $D_{3h}$         |              | TBE             | 2.717 | 2.936 | -0.219        | Ref. 5    |
| exp.            |                  |              | exp.            |       |       | <0            | Ref. 9    |



Table S4: **Results for 2AP, 3AP, and 4AP:** Energies of the  $S_1$  and  $T_1$  states with respect to the  $S_0$  ground state along with the singlet-triplet gap,  $S_1$ - $T_1$ , are given in eV. Methods used for determining the equilibrium geometries and their point groups are also stated. The barrier for automerization,  $E^\ddagger$ , determined with the method used for optimization is stated in kJ/mol. Results from other studies are included for comparison.

| Geometry               |                                        |              | Excited states |       |       |               | Source    |
|------------------------|----------------------------------------|--------------|----------------|-------|-------|---------------|-----------|
| Method                 | Symmetry                               | $E^\ddagger$ | Method         | $S_1$ | $T_1$ | $S_1$ - $T_1$ |           |
| <b>Results for 2AP</b> |                                        |              |                |       |       |               |           |
| B3LYP                  | $C_{2v}, C_s$                          | 0.0          | ADC(2)         | 0.872 | 0.975 | -0.103        | this work |
| $\omega$ B97X-D        | $C_{2v} (B_2, 340i \text{ cm}^{-1})$   | 0.1          | "              | 0.894 | 0.993 | -0.099        | "         |
| "                      | $C_s$                                  |              | "              | 1.007 | 1.041 | -0.034        | "         |
| MP2                    | $C_{2v}$                               | 0.3          | "              | 0.861 | 0.960 | -0.099        | "         |
| "                      | $C_s$                                  |              | "              | 0.851 | 0.948 | -0.097        | "         |
| CCSD                   | $C_{2v}$                               | 9.6          | "              | 0.885 | 0.988 | -0.102        | "         |
| "                      | $C_s$                                  |              | "              | 1.481 | 1.269 | +0.212        | "         |
| CCSD(T)                | $C_{2v}$                               | 2.5          | "              | 0.856 | 0.962 | -0.106        | "         |
| "                      | $C_s$                                  |              | "              | 1.269 | 1.145 | +0.125        | "         |
| B97-3C                 |                                        |              | NEVPT2(12,12)  |       |       | -0.120        | Ref. 1    |
|                        |                                        |              | RMS-CASPT2     | 0.89  | 0.97  | -0.08         | Ref. 2    |
| CCSD(T)                | $C_{2v}$                               |              | ADC(2)         | 1.001 | 1.138 | -0.137        | Ref. 5    |
| CCSD(T)                | $C_{2v}$                               |              | TBE            | 0.833 | 0.904 | -0.071        | Ref. 5    |
| <b>Results for 3AP</b> |                                        |              |                |       |       |               |           |
| B3LYP                  | $C_{2v}, C_s$                          | 0.0          | ADC(2)         | 0.743 | 0.827 | -0.084        | this work |
| $\omega$ B97X-D        | $C_{2v} (B_2, 773i \text{ cm}^{-1})$   | 1.9          | "              | 0.765 | 0.845 | -0.079        | "         |
| "                      | $C_s$                                  |              | "              | 1.238 | 1.049 | +0.189        | "         |
| MP2                    | $C_{2v}, C_s$                          |              | "              | 0.711 | 0.790 | -0.079        | "         |
| CCSD                   | $C_{2v}$                               | 16.8         | "              | 0.745 | 0.826 | -0.081        | "         |
| "                      | $C_s$                                  |              | "              | 1.555 | 1.225 | +0.330        | "         |
| CCSD(T)                | $C_{2v}$                               | 5.9          | "              | 0.714 | 0.797 | -0.083        | "         |
| "                      | $C_s$                                  |              | "              | 1.367 | 1.093 | +0.274        | "         |
| CCSD(T)                | $C_{2v}$                               |              | ADC(2)         | 2.159 | 2.298 | -0.139        | Ref. 5    |
| CCSD(T)                | $C_{2v}$                               |              | TBE            | 0.693 | 0.735 | -0.042        | Ref. 5    |
| <b>Results for 4AP</b> |                                        |              |                |       |       |               |           |
| B3LYP                  | $D_{3h} (A'_2, 494i \text{ cm}^{-1})$  | 0.2          | ADC(2)         | 0.614 | 0.689 | -0.075        | this work |
| "                      | $C_{3h}$                               |              | "              | 0.916 | 0.791 | +0.125        | "         |
| $\omega$ B97X-D        | $D_{3h} (A'_2, 1113i \text{ cm}^{-1})$ | 5.5          | "              | 0.636 | 0.707 | -0.071        | "         |
| "                      | $C_{3h}$                               |              | "              | 1.377 | 1.033 | +0.344        | "         |
| MP2                    | $D_{3h}, C_{3h}$                       |              | "              | 0.573 | 0.648 | -0.074        | "         |
| CCSD                   | $D_{3h}$                               | 26.3         | "              | 0.614 | 0.688 | -0.073        | "         |
| "                      | $C_{3h}$                               |              | "              | 1.635 | 1.203 | +0.432        | "         |
| CCSD(T)                | $D_{3h}$                               | 11.6         | "              | 0.582 | 0.660 | -0.078        | "         |
| "                      | $C_{3h}$                               |              | "              | 1.452 | 1.057 | +0.395        | "         |
| CCSD(T)                | $D_{3h}$                               |              | ADC(2)         | 2.675 | 2.927 | -0.246        | Ref. 5    |
| CCSD(T)                | $D_{3h}$                               |              | TBE            | 0.554 | 0.583 | -0.029        | Ref. 5    |

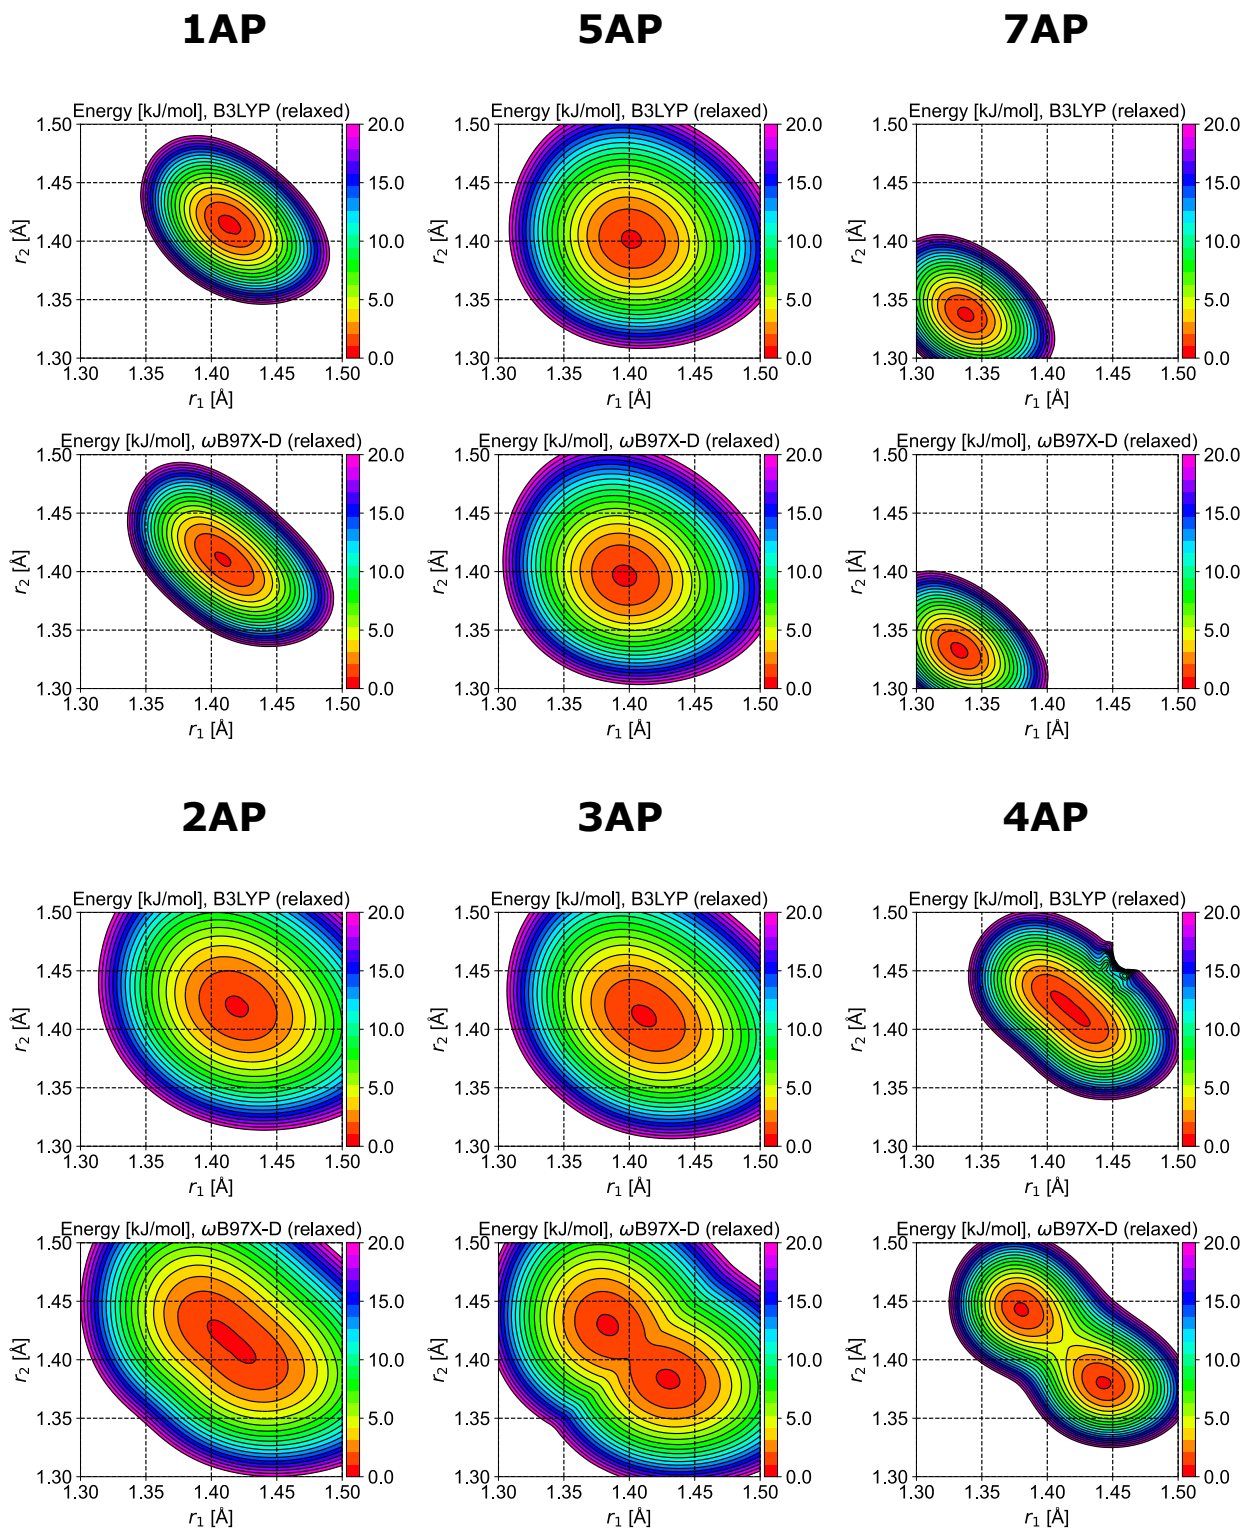

Figure S1: Contour plots of two-dimensional potential energy surfaces (of the ground state,  $S_0$ ) of azaphenalenenes calculated with the DFT methods: B3LYP and  $\omega$ B97X-D. See the main text for more details.

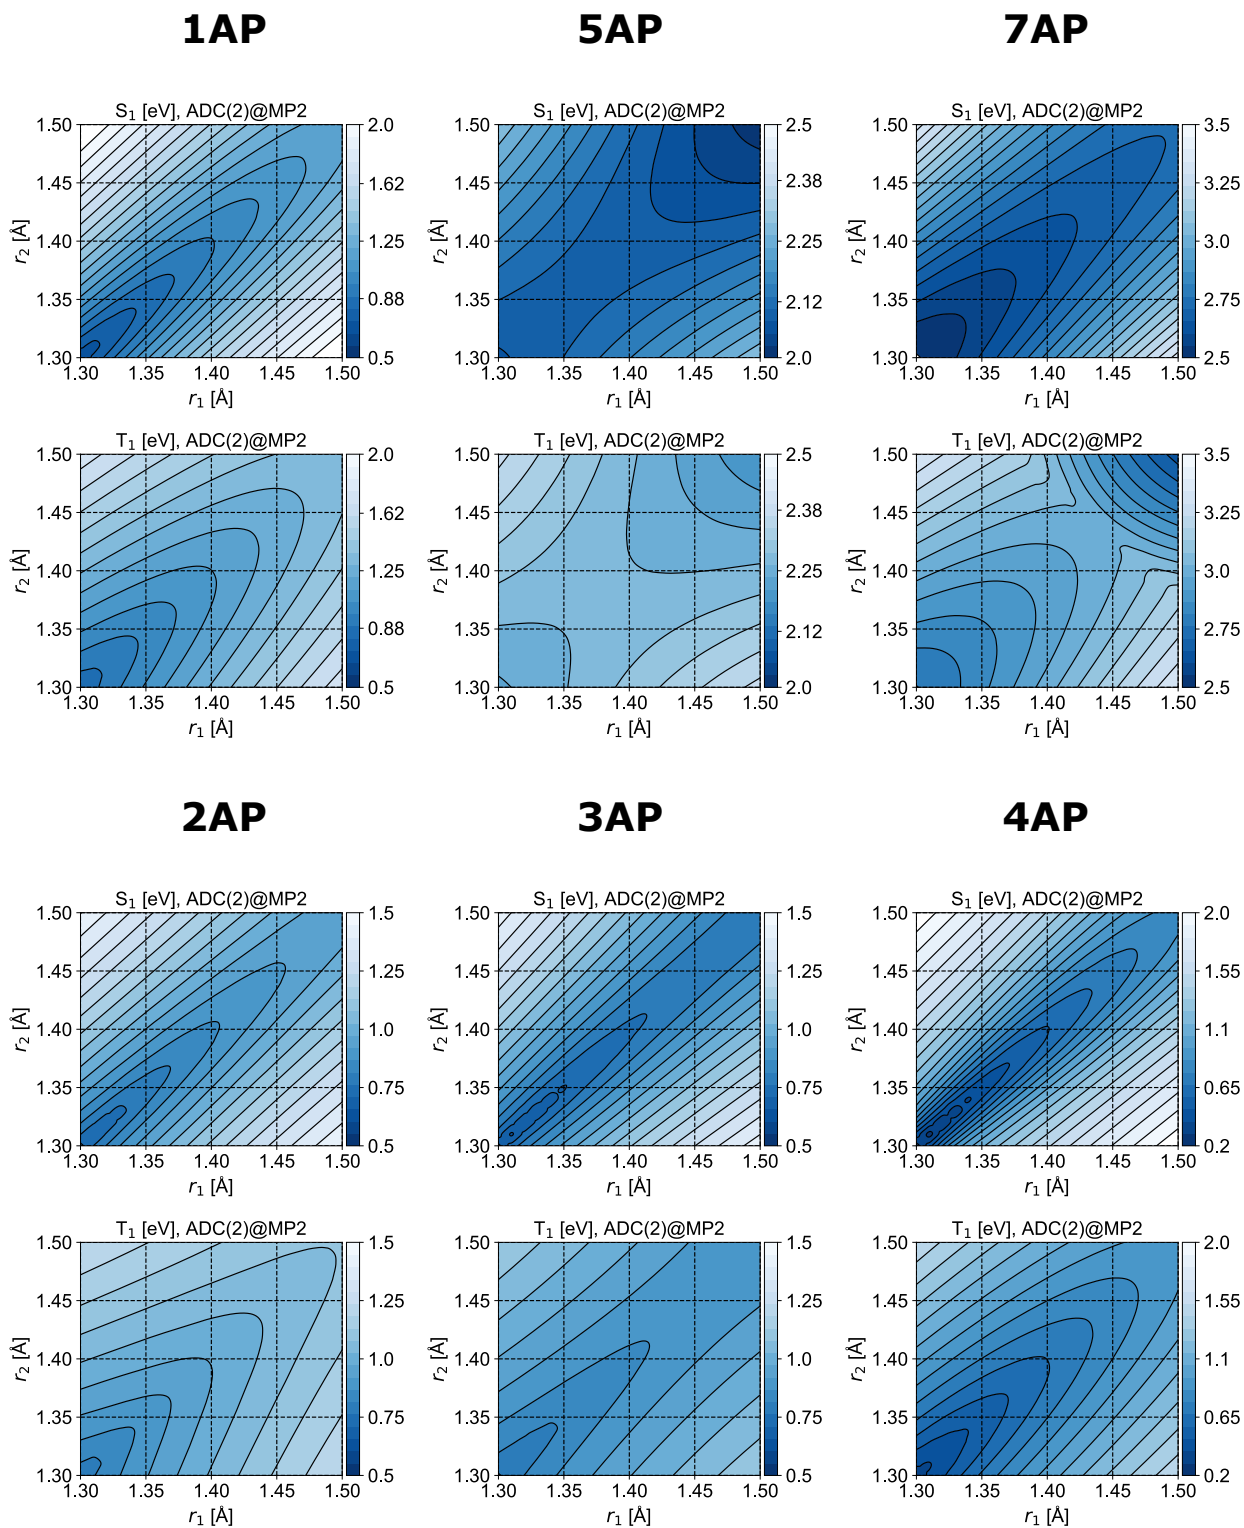

Figure S2: Contour plots of  $S_1$  and  $T_1$  energies of azaphenalenenes. See the main text for more details.

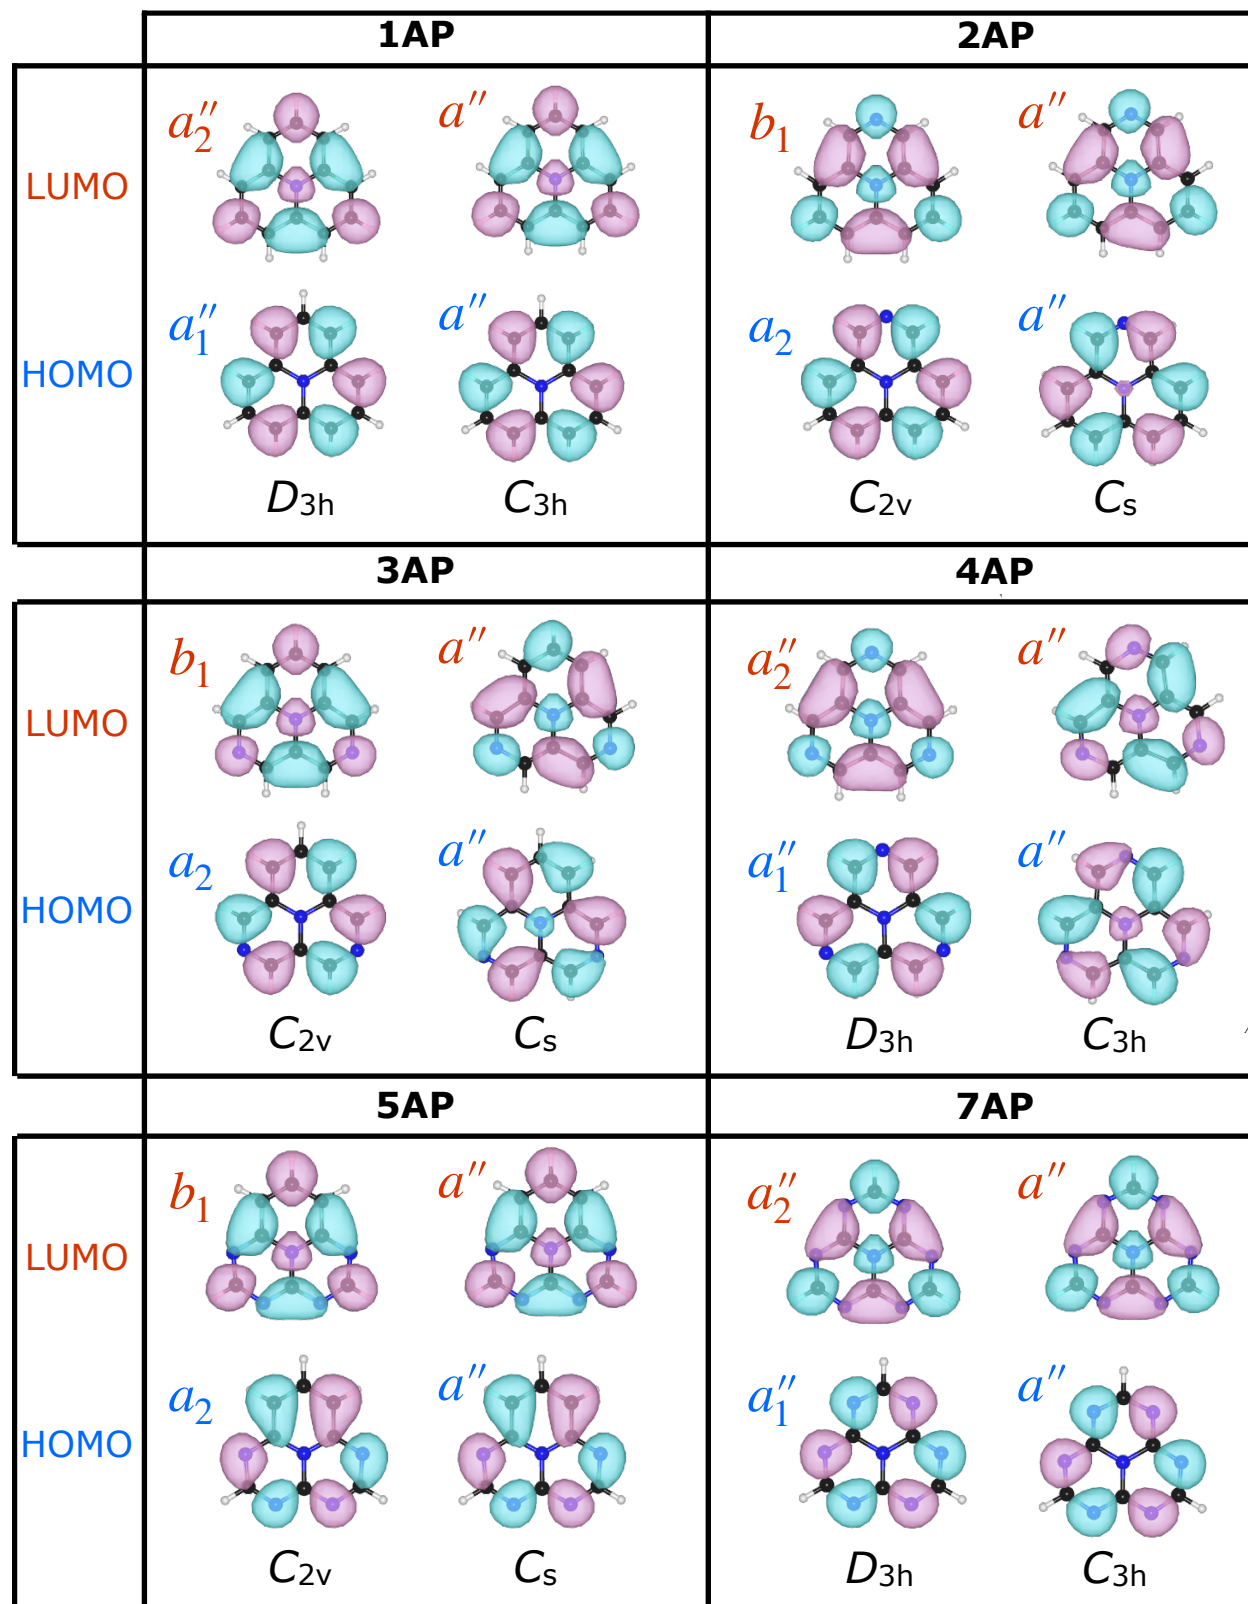

Figure S3: Frontier MOs of azaphenalenenes calculated with the  $\omega$ B97X-D/cc-pVTZ method in the respective equilibrium geometries.

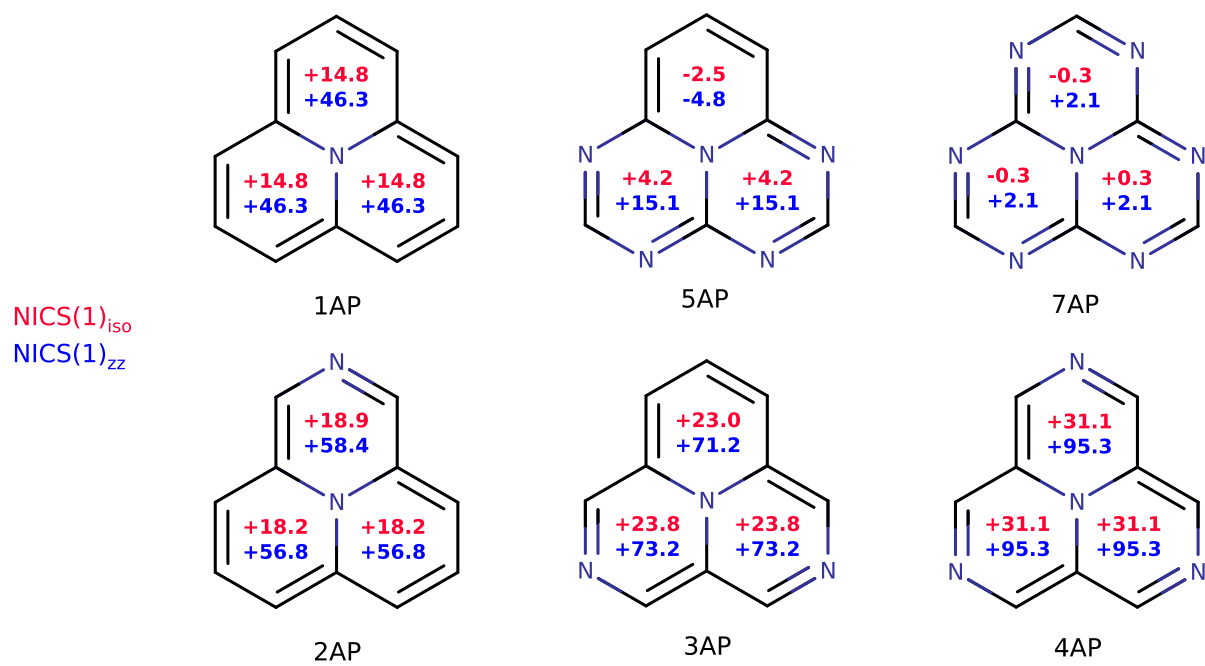

Figure S4: Nucleus-independent chemical shifts (NICS) calculated with the  $\omega$ B97X-D3/cc-pVTZ method.

-----  
EQUILIBRIUM COORDINATES (ANGSTROEM), FROZEN-CORE CCSD(T)/cc-pVTZ  
MOLECULE: 1AP, POINT GROUP: D3H  
-----

CARTESIAN COORDINATES  
-----

22

CCSD(T)/CC-PVTZ ENERGY=-516.45718151

|   |               |               |              |
|---|---------------|---------------|--------------|
| N | -0.0000000000 | 0.0000000000  | 0.0000000000 |
| C | 1.4090613106  | 0.0000000000  | 0.0000000000 |
| C | -0.7045306553 | -1.2202828904 | 0.0000000000 |
| C | -0.7045306553 | 1.2202828904  | 0.0000000000 |
| C | 2.0972867575  | -1.2322296003 | 0.0000000000 |
| C | -2.1157855159 | -1.2001888109 | 0.0000000000 |
| C | 0.0184987584  | 2.4324184112  | 0.0000000000 |
| C | 1.4038057208  | -2.4314628324 | 0.0000000000 |
| C | -2.8076114416 | 0.0000000000  | 0.0000000000 |
| C | 1.4038057208  | 2.4314628324  | 0.0000000000 |
| C | 0.0184987584  | -2.4324184112 | 0.0000000000 |
| C | -2.1157855159 | 1.2001888109  | 0.0000000000 |
| C | 2.0972867575  | 1.2322296003  | 0.0000000000 |
| H | 3.1771396445  | -1.1950402229 | 0.0000000000 |
| H | -2.6235050138 | -2.1539635320 | 0.0000000000 |
| H | -0.5536346307 | 3.3490037549  | 0.0000000000 |
| H | 1.9455458220  | -3.3697842121 | 0.0000000000 |
| H | -3.8910916439 | 0.0000000000  | 0.0000000000 |
| H | 1.9455458220  | 3.3697842121  | 0.0000000000 |
| H | -0.5536346307 | -3.3490037549 | 0.0000000000 |
| H | -2.6235050138 | 2.1539635320  | 0.0000000000 |
| H | 3.1771396445  | 1.1950402229  | 0.0000000000 |

-----  
Z-MATRIX  
-----

geometry={

N1

C1 , N1 , R1  
C2 , N1 , R1 , C1 , 120.0  
C3 , N1 , R1 , C1 , 120.0 , C2 , 180.0  
C4 , C1 , R2 , N1 , A1 , C3 , 180.0  
C5 , C2 , R2 , N1 , A1 , C1 , 180.0  
C6 , C3 , R2 , N1 , A1 , C2 , 180.0  
C7 , N1 , R3 , C1 , 60.0 , C4 , 0.0  
C8 , N1 , R3 , C2 , 60.0 , C5 , 0.0  
C9 , N1 , R3 , C3 , 60.0 , C6 , 0.0  
C10 , C2 , R2 , N1 , A1 , C3 , 180.0  
C11 , C3 , R2 , N1 , A1 , C1 , 180.0  
C12 , C1 , R2 , N1 , A1 , C2 , 180.0

H13 , C4 , R4 , C1 , A2 , N1 , 180.0  
H14 , C5 , R4 , C2 , A2 , N1 , 180.0  
H15 , C6 , R4 , C3 , A2 , N1 , 180.0  
H16 , N1 , R5 , C1 , 60.0 , C4 , 0.0  
H17 , N1 , R5 , C2 , 60.0 , C5 , 0.0  
H18 , N1 , R5 , C3 , 60.0 , C6 , 0.0  
H19 , C10 , R4 , C2 , A2 , N1 , 180.0  
H20 , C11 , R4 , C3 , A2 , N1 , 180.0  
H21 , C12 , R4 , C1 , A2 , N1 , 180.0}

R1= 1.40906131 ANG  
R2= 1.41139791 ANG  
R3= 2.80761144 ANG  
R4= 1.08049309 ANG  
R5= 3.89109164 ANG  
A1= 119.18425212 DEGREE  
A2= 117.21180516 DEGREE

---

-----  
EQUILIBRIUM COORDINATES (ANGSTROEM), FROZEN-CORE CCSD(T)/cc-pVTZ  
MOLECULE: 1AP, POINT GROUP: C3H  
-----

CARTESIAN COORDINATES  
-----

22

CCSD(T)/CC-PVTZ ENERGY=-516.45737101

|   |               |               |              |
|---|---------------|---------------|--------------|
| N | -0.0000000000 | -0.0000000000 | 0.0000000000 |
| C | 1.4102958789  | 0.0000000000  | 0.0000000000 |
| C | -0.7051479395 | -1.2213520580 | 0.0000000000 |
| C | -0.7051479395 | 1.2213520580  | 0.0000000000 |
| C | 2.0874818807  | -1.2604285404 | 0.0000000000 |
| C | -2.1353040760 | -1.1775980685 | 0.0000000000 |
| C | 0.0478221953  | 2.4380266088  | 0.0000000000 |
| C | 1.3925819281  | -2.4404907466 | 0.0000000000 |
| C | -2.8098179483 | 0.0142340467  | 0.0000000000 |
| C | 1.4172360202  | 2.4262566999  | 0.0000000000 |
| C | -0.0118165536 | -2.4277621932 | 0.0000000000 |
| C | -2.0965954569 | 1.2241145322  | 0.0000000000 |
| C | 2.1084120105  | 1.2036476610  | 0.0000000000 |
| H | 3.1682050232  | -1.2317091765 | 0.0000000000 |
| H | -2.6507939485 | -2.1278914463 | 0.0000000000 |
| H | -0.5174110747 | 3.3596006228  | 0.0000000000 |
| H | 1.9254527231  | -3.3837087737 | 0.0000000000 |
| H | -3.8931041186 | 0.0243634149  | 0.0000000000 |
| H | 1.9676513955  | 3.3593453588  | 0.0000000000 |
| H | -0.5905645004 | -3.3398001629 | 0.0000000000 |
| H | -2.5970695345 | 2.1813439414  | 0.0000000000 |
| H | 3.1876340349  | 1.1584562216  | 0.0000000000 |

-----  
Z-MATRIX  
-----

geometry={

N1

C1 , N1 , R1  
C2 , N1 , R1 , C1 , 120.0  
C3 , N1 , R1 , C1 , 120.0 , C2 , 180.0  
C4 , C1 , R21 , N1 , A11 , C3 , 180.0  
C5 , C2 , R21 , N1 , A11 , C1 , 180.0  
C6 , C3 , R21 , N1 , A11 , C2 , 180.0  
C7 , N1 , R3 , C1 , A3 , C4 , 0.0  
C8 , N1 , R3 , C2 , A3 , C5 , 0.0  
C9 , N1 , R3 , C3 , A3 , C6 , 0.0  
C10 , C2 , R22 , N1 , A12 , C3 , 180.0  
C11 , C3 , R22 , N1 , A12 , C1 , 180.0  
C12 , C1 , R22 , N1 , A12 , C2 , 180.0



H13 , C4 , R41 , C1 , A21 , N1 , 180.0  
 H14 , C5 , R41 , C2 , A21 , N1 , 180.0  
 H15 , C6 , R41 , C3 , A21 , N1 , 180.0  
 H16 , N1 , R5 , C1 , A4 , C4 , 0.0  
 H17 , N1 , R5 , C2 , A4 , C5 , 0.0  
 H18 , N1 , R5 , C3 , A4 , C6 , 0.0  
 H19 , C10 , R42 , C2 , A22 , N1 , 180.0  
 H20 , C11 , R42 , C3 , A22 , N1 , 180.0  
 H21 , C12 , R42 , C1 , A22 , N1 , 180.0}

R1= 1.41029588 ANG  
 R21= 1.43082528 ANG  
 R22= 1.39145026 ANG  
 R3= 2.80985400 ANG  
 R41= 1.08110467 ANG  
 R42= 1.08016779 ANG  
 R5= 3.89318035 ANG  
 A11= 118.24764782 DEGREE  
 A12= 120.11375054 DEGREE  
 A21= 116.72541599 DEGREE  
 A22= 117.71594276 DEGREE  
 A3= 60.29024792 DEGREE  
 A4= 60.35855774 DEGREE

---

-----  
EQUILIBRIUM COORDINATES (ANGSTROEM), FROZEN-CORE CCSD(T)/cc-pVTZ  
MOLECULE: 5AP, POINT GROUP: C2V  
-----

CARTESIAN COORDINATES  
-----

18

CCSD(T)/CC-PVTZ ENERGY=-580.61455705

|   |              |               |               |
|---|--------------|---------------|---------------|
| N | 0.0000000000 | 0.0000000000  | -0.0209337139 |
| C | 0.0000000000 | 0.0000000000  | 1.3959162652  |
| C | 0.0000000000 | 1.2239982977  | -0.6919457558 |
| C | 0.0000000000 | -1.2239982977 | -0.6919457558 |
| C | 0.0000000000 | 1.2095528292  | -2.0899593840 |
| C | 0.0000000000 | -1.2095528292 | -2.0899593840 |
| C | 0.0000000000 | 0.0000000000  | -2.7748568006 |
| N | 0.0000000000 | 2.3932182796  | -0.0052415583 |
| N | 0.0000000000 | -2.3932182796 | -0.0052415583 |
| C | 0.0000000000 | 2.2752712648  | 1.3127808253  |
| C | 0.0000000000 | -2.2752712648 | 1.3127808253  |
| N | 0.0000000000 | -1.1592137265 | 2.0571477735  |
| N | 0.0000000000 | 1.1592137265  | 2.0571477735  |
| H | 0.0000000000 | 2.1667462052  | -2.5888851619 |
| H | 0.0000000000 | -2.1667462052 | -2.5888851619 |
| H | 0.0000000000 | 0.0000000000  | -3.8578325493 |
| H | 0.0000000000 | 3.2048943207  | 1.8718610719  |
| H | 0.0000000000 | -3.2048943207 | 1.8718610719  |

-----  
Z-MATRIX  
-----

geometry={

Q1

N2 , Q1 , 1.0  
C3 , N2 , R1 ,Q1 , 90.0  
C4 , N2 , R2 ,C3 , A1 , Q1 , 90.0  
C5 , N2 , R2 ,C3 , A1 , Q1 , -90.0  
C6 , C4 , R3 ,N2 , A2 , C3 , 180.0  
C7 , C5 , R3 ,N2 , A2 , C3 , 180.0  
C8 , N2 , R4 ,Q1 , 90.0 , C3 , 180.0  
N9 , C4 , R5 ,C6 , A3 , C8 , 180.0  
N10 , C5 , R5 ,C7 , A3 , C8 , 180.0  
C11 , N9 , R6 ,C4 , A4 , C6 , 180.0  
C12 , N10 , R6 ,C5 , A4 , C7 , 180.0  
N13 , C3 , R7 ,N2 , A5 , Q1 , 90.0  
N14 , C3 , R7 ,N2 , A5 , Q1 , -90.0  
H15 , C6 , R8 ,C4 , A6 , N2 , 180.0  
H16 , C7 , R8 ,C5 , A6 , N2 , 180.0  
H17 , N2 , R9 ,Q1 , 90.0 , C3 , 180.0

H18 , C11 , R10 ,N9 , A7 , C4 , 180.0  
H19 , C12 , R10 ,N10 , A7 , C5 , 180.0}

R1= 1.41684998 ANG  
R2= 1.39586138 ANG  
R3= 1.39808826 ANG  
R4= 2.75392309 ANG  
R5= 1.35596387 ANG  
R6= 1.32328927 ANG  
R7= 1.33454246 ANG  
R8= 1.07941933 ANG  
R9= 3.83689884 ANG  
R10= 1.08479019 ANG  
A1= 118.73213541 DEGREE  
A2= 118.14012765 DEGREE  
A3= 121.01850011 DEGREE  
A4= 115.31283627 DEGREE  
A5= 119.70103198 DEGREE  
A6= 116.93824030 DEGREE  
A7= 115.90926862 DEGREE

---

-----  
EQUILIBRIUM COORDINATES (ANGSTROEM), FROZEN-CORE CCSD(T)/cc-pVTZ  
MOLECULE: 7AP, POINT GROUP: D3H  
-----

CARTESIAN COORDINATES  
-----

16

CCSD(T)/CC-PVTZ ENERGY=-612.67978274

|   |               |               |              |
|---|---------------|---------------|--------------|
| N | -0.0000000000 | 0.0000000000  | 0.0000000000 |
| C | 1.4025590960  | 0.0000000000  | 0.0000000000 |
| C | -0.7012795480 | -1.2146518075 | 0.0000000000 |
| C | -0.7012795480 | 1.2146518075  | 0.0000000000 |
| N | 2.0624112763  | -1.1624036292 | 0.0000000000 |
| N | -2.0378767105 | -1.2048987437 | 0.0000000000 |
| N | -0.0245345658 | 2.3673023730  | 0.0000000000 |
| C | 1.3055871332  | -2.2613432484 | 0.0000000000 |
| C | -2.6111742664 | 0.0000000000  | 0.0000000000 |
| C | 1.3055871332  | 2.2613432484  | 0.0000000000 |
| N | -0.0245345658 | -2.3673023730 | 0.0000000000 |
| N | -2.0378767105 | 1.2048987437  | 0.0000000000 |
| N | 2.0624112763  | 1.1624036292  | 0.0000000000 |
| H | 1.8477262446  | -3.2003557341 | 0.0000000000 |
| H | -3.6954524892 | 0.0000000000  | 0.0000000000 |
| H | 1.8477262446  | 3.2003557341  | 0.0000000000 |

-----  
Z-MATRIX  
-----

geometry={

N1

C1 , N1 , R1  
C2 , N1 , R1 , C1 , 120.0  
C3 , N1 , R1 , C1 , 120.0 , C2 , 180.0  
N4 , C1 , R2 , N1 , A1 , C3 , 180.0  
N5 , C2 , R2 , N1 , A1 , C1 , 180.0  
N6 , C3 , R2 , N1 , A1 , C2 , 180.0  
C7 , N1 , R3 , C1 , 60.0 , N4 , 0.0  
C8 , N1 , R3 , C2 , 60.0 , N5 , 0.0  
C9 , N1 , R3 , C3 , 60.0 , N6 , 0.0  
N10 , C2 , R2 , N1 , A1 , C3 , 180.0  
N11 , C3 , R2 , N1 , A1 , C1 , 180.0  
N12 , C1 , R2 , N1 , A1 , C2 , 180.0  
H16 , N1 , R4 , C1 , 60.0 , N4 , 0.0  
H17 , N1 , R4 , C2 , 60.0 , N5 , 0.0  
H18 , N1 , R4 , C3 , 60.0 , N6 , 0.0}

R1= 1.40255910 ANG

R2= 1.33663275 ANG

R3= 2.61117427 ANG  
R4= 3.69545249 ANG  
A1= 119.58192379 DEGREE

---

-----  
EQUILIBRIUM COORDINATES (ANGSTROEM), FROZEN-CORE CCSD(T)/cc-pVTZ  
MOLECULE: 2AP, POINT GROUP: C2V  
-----

CARTESIAN COORDINATES  
-----

21

CCSD(T)/CC-PVTZ ENERGY=-532.47959209

|   |              |               |               |
|---|--------------|---------------|---------------|
| N | 0.0000000000 | 0.0000000000  | 0.0248325005  |
| C | 0.0000000000 | 0.0000000000  | 1.4290623782  |
| C | 0.0000000000 | 1.2078318281  | -0.6816722169 |
| C | 0.0000000000 | -1.2078318281 | -0.6816722169 |
| C | 0.0000000000 | 1.1361626851  | -2.0998624488 |
| C | 0.0000000000 | -1.1361626851 | -2.0998624488 |
| N | 0.0000000000 | 0.0000000000  | -2.7913610218 |
| C | 0.0000000000 | 2.4312143725  | 0.0133915849  |
| C | 0.0000000000 | -2.4312143725 | 0.0133915849  |
| C | 0.0000000000 | 2.4361423616  | 1.4014105437  |
| C | 0.0000000000 | -2.4361423616 | 1.4014105437  |
| C | 0.0000000000 | -1.2409740228 | 2.1053260238  |
| C | 0.0000000000 | 1.2409740228  | 2.1053260238  |
| H | 0.0000000000 | 2.0691835901  | -2.6488864922 |
| H | 0.0000000000 | -2.0691835901 | -2.6488864922 |
| H | 0.0000000000 | 3.3405675958  | -0.5697082153 |
| H | 0.0000000000 | -3.3405675958 | -0.5697082153 |
| H | 0.0000000000 | 3.3764935994  | 1.9393551417  |
| H | 0.0000000000 | -3.3764935994 | 1.9393551417  |
| H | 0.0000000000 | -1.2161284987 | 3.1855901804  |
| H | 0.0000000000 | 1.2161284987  | 3.1855901804  |

-----  
Z-MATRIX  
-----

geometry={

Q1

N2 , Q1 , 1.0  
C3 , N2 , R1 , Q1 , 90.0  
C4 , N2 , R21 , C3 , A11 , Q1 , 90.0  
C5 , N2 , R21 , C3 , A11 , Q1 , -90.0  
C6 , C4 , 1.42 , N2 , A21 , C3 , 180.0  
C7 , C5 , 1.42 , N2 , A21 , C3 , 180.0  
N8 , N2 , R4 , Q1 , 90.0 , C3 , 180.0  
C9 , C4 , R51 , C6 , A31 , N8 , 180.0  
C10 , C5 , R51 , C7 , A31 , N8 , 180.0  
C11 , C9 , R61 , C4 , A41 , C6 , 180.0  
C12 , C10 , R61 , C5 , A41 , C7 , 180.0  
C13 , C3 , R71 , N2 , A51 , Q1 , 90.0  
C14 , C3 , R71 , N2 , A51 , Q1 , -90.0

H15 , C6 , R81 , C4 , A61 , N2 , 180.0  
 H16 , C7 , R81 , C5 , A61 , N2 , 180.0  
 H17 , C9 , R91 , C4 , A71 , N2 , 180.0  
 H18 , C10 , R91 , C5 , A71 , N2 , 180.0  
 H19 , C11 , R101 , C9 , A81 , C4 , 180.0  
 H20 , C12 , R101 , C10 , A81 , C5 , 180.0  
 H21 , C13 , R111 , C3 , A91 , N2 , 180.0  
 H22 , C14 , R111 , C3 , A91 , N2 , 180.0}

R1= 1.40422988 ANG  
 R21= 1.39928790 ANG  
 R4= 2.81619352 ANG  
 R51= 1.40704603 ANG  
 R61= 1.38802771 ANG  
 R71= 1.41327600 ANG  
 R81= 1.08256889 ANG  
 R91= 1.08024472 ANG  
 R101= 1.08334890 ANG  
 R111= 1.08054984 ANG  
 A11= 120.32491617 DEGREE  
 A21= 117.43189871 DEGREE  
 A31= 122.49605497 DEGREE  
 A41= 119.80645820 DEGREE  
 A51= 118.58799201 DEGREE  
 A61= 117.58111363 DEGREE  
 A71= 117.72796459 DEGREE  
 A81= 119.97590106 DEGREE  
 A91= 117.27045062 DEGREE

-----

-----  
EQUILIBRIUM COORDINATES (ANGSTROEM), FROZEN-CORE CCSD(T)/cc-pVTZ  
MOLECULE: 2AP, POINT GROUP: CS  
-----

CARTESIAN COORDINATES  
-----

21

CCSD(T)/CC-PVTZ ENERGY=-532.48054565

|   |              |               |               |
|---|--------------|---------------|---------------|
| N | 0.0000000000 | -0.0045831784 | 0.0256744030  |
| C | 0.0000000000 | -0.0653222374 | 1.4328110801  |
| C | 0.0000000000 | 1.2349703896  | -0.6238470103 |
| C | 0.0000000000 | -1.1796125221 | -0.7439882171 |
| C | 0.0000000000 | 1.2001927918  | -2.0721810380 |
| C | 0.0000000000 | -1.0755525634 | -2.1230678573 |
| N | 0.0000000000 | 0.1172406921  | -2.7966089725 |
| C | 0.0000000000 | 2.4209431626  | 0.0784696912  |
| C | 0.0000000000 | -2.4422851071 | -0.0575750796 |
| C | 0.0000000000 | 2.3859073808  | 1.4986888985  |
| C | 0.0000000000 | -2.4928065436 | 1.3058067208  |
| C | 0.0000000000 | -1.2937083640 | 2.0669099437  |
| C | 0.0000000000 | 1.1868583471  | 2.1491593335  |
| H | 0.0000000000 | 2.1601623484  | -2.5787913104 |
| H | 0.0000000000 | -1.9796425986 | -2.7154936531 |
| H | 0.0000000000 | 3.3481710306  | -0.4755702300 |
| H | 0.0000000000 | -3.3337207740 | -0.6698562121 |
| H | 0.0000000000 | 3.3094589364  | 2.0645423722  |
| H | 0.0000000000 | -3.4495452735 | 1.8138331151  |
| H | 0.0000000000 | -1.3101702046 | 3.1471666469  |
| H | 0.0000000000 | 1.1246713808  | 3.2292659990  |

-----  
Z-MATRIX  
-----

geometry={

Q1

|     |   |     |   |     |   |    |   |      |   |    |   |       |
|-----|---|-----|---|-----|---|----|---|------|---|----|---|-------|
| N2  | , | Q1  | , | 1.0 |   |    |   |      |   |    |   |       |
| C3  | , | N2  | , | R1  | , | Q1 | , | 90.0 |   |    |   |       |
| C4  | , | N2  | , | R21 | , | C3 | , | A11  | , | Q1 | , | 90.0  |
| C5  | , | N2  | , | R22 | , | C3 | , | A12  | , | Q1 | , | -90.0 |
| C6  | , | C4  | , | R31 | , | N2 | , | A21  | , | C3 | , | 180.0 |
| C7  | , | C5  | , | R32 | , | N2 | , | A22  | , | C3 | , | 180.0 |
| N8  | , | N2  | , | R4  | , | Q1 | , | 90.0 | , | C3 | , | 180.0 |
| C9  | , | C4  | , | R51 | , | C6 | , | A31  | , | N8 | , | 180.0 |
| C10 | , | C5  | , | R52 | , | C7 | , | A32  | , | N8 | , | 180.0 |
| C11 | , | C9  | , | R61 | , | C4 | , | A41  | , | C6 | , | 180.0 |
| C12 | , | C10 | , | R62 | , | C5 | , | A42  | , | C7 | , | 180.0 |
| C13 | , | C3  | , | R71 | , | N2 | , | A51  | , | Q1 | , | 90.0  |
| C14 | , | C3  | , | R72 | , | N2 | , | A52  | , | Q1 | , | -90.0 |



|     |   |     |   |      |   |     |   |     |   |    |   |        |
|-----|---|-----|---|------|---|-----|---|-----|---|----|---|--------|
| H15 | , | C6  | , | R81  | , | C4  | , | A61 | , | N2 | , | 180.0  |
| H16 | , | C7  | , | R82  | , | C5  | , | A62 | , | N2 | , | 180.0  |
| H17 | , | C9  | , | R91  | , | C4  | , | A71 | , | N2 | , | 180.0  |
| H18 | , | C10 | , | R92  | , | C5  | , | A72 | , | N2 | , | 180.0  |
| H19 | , | C11 | , | R101 | , | C9  | , | A81 | , | C4 | , | 80.0   |
| H20 | , | C12 | , | R102 | , | C10 | , | A82 | , | C5 | , | 180.0  |
| H21 | , | C13 | , | R111 | , | C3  | , | A91 | , | N2 | , | 180.0  |
| H22 | , | C14 | , | R112 | , | C3  | , | A92 | , | N2 | , | 180.0} |

|       |              |        |
|-------|--------------|--------|
| R1=   | 1.40844697   | ANG    |
| R21=  | 1.39941813   | ANG    |
| R22=  | 1.40466171   | ANG    |
| R31=  | 1.44875151   | ANG    |
| R32=  | 1.38300005   | ANG    |
| R4=   | 2.82491142   | ANG    |
| R51=  | 1.37832513   | ANG    |
| R52=  | 1.43718651   | ANG    |
| R61=  | 1.42065130   | ANG    |
| R62=  | 1.36431754   | ANG    |
| R71=  | 1.38239424   | ANG    |
| R72=  | 1.44260564   | ANG    |
| R81=  | 1.08544715   | ANG    |
| R82=  | 1.08090107   | ANG    |
| R91=  | 1.08014432   | ANG    |
| R92=  | 1.08145538   | ANG    |
| R101= | 1.08311478   | ANG    |
| R102= | 1.08325427   | ANG    |
| R111= | 1.08038213   | ANG    |
| R112= | 1.08189539   | ANG    |
| A11=  | 120.12600781 | DEGREE |
| A12=  | 120.75378845 | DEGREE |
| A21=  | 116.27883973 | DEGREE |
| A22=  | 118.91028829 | DEGREE |
| A31=  | 122.00896152 | DEGREE |
| A32=  | 122.84449320 | DEGREE |
| A41=  | 119.22027278 | DEGREE |
| A42=  | 120.65153460 | DEGREE |
| A51=  | 119.77464009 | DEGREE |
| A52=  | 117.30139889 | DEGREE |
| A61=  | 116.44668394 | DEGREE |
| A62=  | 118.92060510 | DEGREE |
| A71=  | 118.50728259 | DEGREE |
| A72=  | 116.98748256 | DEGREE |
| A81=  | 120.08234665 | DEGREE |
| A82=  | 120.09039442 | DEGREE |
| A91=  | 118.17605456 | DEGREE |
| A92=  | 116.47787965 | DEGREE |

-----

-----  
EQUILIBRIUM COORDINATES (ANGSTROEM), FROZEN-CORE CCSD(T)/cc-pVTZ  
MOLECULE: 3AP, POINT GROUP: C2V  
-----

CARTESIAN COORDINATES  
-----

20

CCSD(T)/CC-PVTZ ENERGY=-548.50029036

|   |               |              |               |
|---|---------------|--------------|---------------|
| N | 0.0000000000  | 0.0000000000 | -0.0290948978 |
| C | 0.0000000000  | 0.0000000000 | 1.3669984084  |
| C | -1.2168465284 | 0.0000000000 | -0.7084797812 |
| C | 1.2168465284  | 0.0000000000 | -0.7084797812 |
| C | -1.2064367713 | 0.0000000000 | -2.1185246596 |
| C | 1.2064367713  | 0.0000000000 | -2.1185246596 |
| C | 0.0000000000  | 0.0000000000 | -2.8062433640 |
| C | -2.4039234215 | 0.0000000000 | 0.0664921221  |
| C | 2.4039234215  | 0.0000000000 | 0.0664921221  |
| N | -2.4222905439 | 0.0000000000 | 1.3968479847  |
| N | 2.4222905439  | 0.0000000000 | 1.3968479847  |
| C | 1.2485138341  | 0.0000000000 | 2.0294160803  |
| C | -1.2485138341 | 0.0000000000 | 2.0294160803  |
| H | -2.1584950794 | 0.0000000000 | -2.6293185356 |
| H | 2.1584950794  | 0.0000000000 | -2.6293185356 |
| H | 0.0000000000  | 0.0000000000 | -3.8894859148 |
| H | -3.3500423056 | 0.0000000000 | -0.4592347960 |
| H | 3.3500423056  | 0.0000000000 | -0.4592347960 |
| H | 1.2501853399  | 0.0000000000 | 3.1116676060  |
| H | -1.2501853399 | 0.0000000000 | 3.1116676060  |

-----  
Z-MATRIX  
-----

geometry={

Q1

N2 , Q1 , 1.  
C3 , N2 , R1 , Q1 , 90.  
C4 , N2 , R21 , C3 , A11 , Q1 , 90.  
C5 , N2 , R21 , C3 , A11 , Q1 , -90.  
C6 , C4 , R31 , N2 , A21 , C3 , 180.  
C7 , C5 , R31 , N2 , A21 , C3 , 180.  
C8 , N2 , R4 , Q1 , 90. , C3 , 180.  
C9 , C4 , R51 , C6 , A31 , C8 , 180.  
C10 , C5 , R51 , C7 , A31 , C8 , 180.  
N11 , C9 , R61 , C4 , A41 , C6 , 180.  
N12 , C10 , R61 , C5 , A41 , C7 , 180.  
C13 , C3 , R71 , N2 , A51 , Q1 , 90.  
C14 , C3 , R71 , N2 , A51 , Q1 , -90.  
H15 , C6 , R81 , C4 , A61 , N2 , 180.

H16 , C7 , R81 , C5 , A61 , N2 , 180.  
H17 , N2 , R9 , Q1 , 90. , C3 , 180.  
H18 , C9 , R101 , C4 , A71 , N2 , 180.  
H19 , C10 , R101 , C5 , A71 , N2 , 180.  
H20 , C13 , R111 , C3 , A81 , N2 , 180.  
H21 , C14 , R111 , C3 , A81 , N2 , 180.}

R1= 1.39609331 ANG  
R21= 1.39365681 ANG  
R31= 1.41008330 ANG  
R4= 2.77714847 ANG  
R51= 1.41765052 ANG  
R61= 1.33048265 ANG  
R71= 1.41335911 ANG  
R81= 1.08042834 ANG  
R9= 3.86039102 ANG  
R101= 1.08237227 ANG  
R111= 1.08225282 ANG  
A11= 119.17532185 DEGREE  
A21= 118.75233935 DEGREE  
A31= 123.56111295 DEGREE  
A41= 123.92911561 DEGREE  
A51= 117.94885423 DEGREE  
A61= 117.79125752 DEGREE  
A71= 117.80239208 DEGREE  
A81= 118.03734581 DEGREE

---

-----  
EQUILIBRIUM COORDINATES (ANGSTROEM), FROZEN-CORE CCSD(T)/cc-pVTZ  
MOLECULE: 3AP, POINT GROUP: CS  
-----

CARTESIAN COORDINATES  
-----

20

CCSD(T)/CC-PVTZ ENERGY=-548.50254805

|   |               |              |               |
|---|---------------|--------------|---------------|
| N | -0.0301087996 | 0.0000000000 | -0.0071919123 |
| C | 1.3672653196  | 0.0000000000 | 0.0434018915  |
| C | -0.7451386686 | 0.0000000000 | 1.1985859497  |
| C | -0.6743830266 | 0.0000000000 | -1.2451826933 |
| C | -2.1854701157 | 0.0000000000 | 1.1008388321  |
| C | -2.0478183588 | 0.0000000000 | -1.3162538802 |
| C | -2.8111683861 | 0.0000000000 | -0.1078839037 |
| C | -0.0667671869 | 0.0000000000 | 2.3955584988  |
| C | 0.1946360907  | 0.0000000000 | -2.4104311060 |
| N | 1.3092378138  | 0.0000000000 | 2.4841624359  |
| N | 1.4945797827  | 0.0000000000 | -2.3753924311 |
| C | 2.0868659377  | 0.0000000000 | -1.1279470207 |
| C | 1.9703973364  | 0.0000000000 | 1.3638484277  |
| H | -2.7395722113 | 0.0000000000 | 2.0300723981  |
| H | -2.5188281841 | 0.0000000000 | -2.2885833186 |
| H | -3.8933635152 | 0.0000000000 | -0.1470662294 |
| H | -0.6238735158 | 0.0000000000 | 3.3211015155  |
| H | -0.2953113948 | 0.0000000000 | -3.3792420842 |
| H | 3.1668701502  | 0.0000000000 | -1.0931161855 |
| H | 3.0551323907  | 0.0000000000 | 1.4020293484  |

-----  
Z-MATRIX  
-----

geometry={

Q1

N2 , Q1 , 1.  
C3 , N2 , R1 , Q1 , 90.  
C4 , N2 , R21 , C3 , A11 , Q1 , 90.  
C5 , N2 , R22 , C3 , A12 , Q1 , -90.  
C6 , C4 , R31 , N2 , A21 , C3 , 180.  
C7 , C5 , R32 , N2 , A22 , C3 , 180.  
C8 , N2 , R4 , Q1 , 90. , C3 , 180.  
C9 , C4 , R51 , C6 , A31 , C8 , 180.  
C10 , C5 , R52 , C7 , A32 , C8 , 180.  
N11 , C9 , R61 , C4 , A41 , C6 , 180.  
N12 , C10 , R62 , C5 , A42 , C7 , 180.  
C13 , C3 , R71 , N2 , A51 , Q1 , 90.  
C14 , C3 , R72 , N2 , A52 , Q1 , -90.  
H15 , C6 , R81 , C4 , A61 , N2 , 180.

H16 , C7 , R82 , C5 , A62 , N2 , 180.  
H17 , N2 , R9 , Q1 , 90. , C3 , 180.  
H18 , C9 , R101 , C4 , A71 , N2 , 180.  
H19 , C10 , R102 , C5 , A72 , N2 , 180.  
H20 , C13 , R111 , C3 , A81 , N2 , 180.  
H21 , C14 , R112 , C3 , A82 , N2 , 180.}

R1= 1.39828973 ANG  
R21= 1.40184449 ANG  
R22= 1.39560397 ANG  
R31= 1.44364441 ANG  
R32= 1.37527296 ANG  
R4= 2.78288183 ANG  
R51= 1.37583834 ANG  
R52= 1.45361552 ANG  
R61= 1.37885475 ANG  
R62= 1.30041582 ANG  
R71= 1.37473027 ANG  
R72= 1.45167052 ANG  
R81= 1.08189840 ANG  
R82= 1.08040492 ANG  
R9= 3.86578605 ANG  
R101= 1.08027651 ANG  
R102= 1.08565337 ANG  
R111= 1.08056573 ANG  
R112= 1.08540680 ANG  
A11= 118.59450254 DEGREE  
A12= 119.56690131 DEGREE  
A21= 116.78568095 DEGREE  
A22= 120.45558028 DEGREE  
A31= 123.42432210 DEGREE  
A32= 123.75260069 DEGREE  
A41= 123.22624833 DEGREE  
A42= 125.17086814 DEGREE  
A51= 119.49029669 DEGREE  
A52= 116.62276352 DEGREE  
A61= 116.92524294 DEGREE  
A62= 118.80843317 DEGREE  
A71= 119.41333011 DEGREE  
A72= 116.45850051 DEGREE  
A81= 119.71667571 DEGREE  
A82= 116.56508535 DEGREE

---

-----  
EQUILIBRIUM COORDINATES (ANGSTROEM), FROZEN-CORE CCSD(T)/cc-pVTZ  
MOLECULE: 4AP, POINT GROUP: D3H  
-----

CARTESIAN COORDINATES  
-----

19

CCSD(T)/CC-PVTZ ENERGY=-564.51919933

|   |               |               |              |
|---|---------------|---------------|--------------|
| N | -0.0000000000 | 0.0000000000  | 0.0000000000 |
| C | 1.3895222367  | 0.0000000000  | 0.0000000000 |
| C | -0.6947611183 | -1.2033615561 | 0.0000000000 |
| C | -0.6947611183 | 1.2033615561  | 0.0000000000 |
| C | 2.0427788439  | -1.2553814140 | 0.0000000000 |
| C | -2.1085816179 | -1.1414076661 | 0.0000000000 |
| C | 0.0658027740  | 2.3967890801  | 0.0000000000 |
| N | 1.3980302792  | -2.4214594740 | 0.0000000000 |
| N | -2.7960605583 | 0.0000000000  | 0.0000000000 |
| N | 1.3980302792  | 2.4214594740  | 0.0000000000 |
| C | 0.0658027740  | -2.3967890801 | 0.0000000000 |
| C | -2.1085816179 | 1.1414076661  | 0.0000000000 |
| C | 2.0427788439  | 1.2553814140  | 0.0000000000 |
| H | 3.1249114130  | -1.2687198584 | 0.0000000000 |
| H | -2.6611993341 | -2.0718927391 | 0.0000000000 |
| H | -0.4637120789 | 3.3406125974  | 0.0000000000 |
| H | -0.4637120789 | -3.3406125974 | 0.0000000000 |
| H | -2.6611993341 | 2.0718927391  | 0.0000000000 |
| H | 3.1249114130  | 1.2687198584  | 0.0000000000 |

-----  
Z-MATRIX  
-----

geometry={

N1

C1 , N1 , R1  
C2 , N1 , R1 , C1 , 120.0  
C3 , N1 , R1 , C1 , 120.0 , C2 , 180.0  
C4 , C1 , R2 , N1 , A11 , C3 , 180.0  
C5 , C2 , R2 , N1 , A11 , C1 , 180.0  
C6 , C3 , R2 , N1 , A11 , C2 , 180.0  
N2 , N1 , R3 , C1 , 60.0 , C4 , 0.0  
N3 , N1 , R3 , C2 , 60.0 , C5 , 0.0  
N4 , N1 , R3 , C3 , 60.0 , C6 , 0.0  
C7 , C2 , R2 , N1 , A11 , C3 , 180.0  
C8 , C3 , R2 , N1 , A11 , C1 , 180.0  
C9 , C1 , R2 , N1 , A11 , C2 , 180.0  
H1 , C4 , R41 , C1 , A21 , N1 , 180.0  
H2 , C5 , R41 , C2 , A21 , N1 , 180.0  
H3 , C6 , R41 , C3 , A21 , N1 , 180.0

H4 , C7 , R41 , C2 , A21 , N1 , 180.0  
H5 , C8 , R41 , C3 , A21 , N1 , 180.0  
H6 , C9 , R41 , C1 , A21 , N1 , 180.0}

R1= 1.38952224 ANG  
R2= 1.41517726 ANG  
R3= 2.79606056 ANG  
R41= 1.08221477 ANG  
A11= 117.49089295 DEGREE  
A21= 118.19708911 DEGREE

---



-----  
EQUILIBRIUM COORDINATES (ANGSTROEM), FROZEN-CORE CCSD(T)/cc-pVTZ  
MOLECULE: 4AP, POINT GROUP: C3H  
-----

CARTESIAN COORDINATES  
-----

19

CCSD(T)/CC-PVTZ ENERGY=-564.52363202

|   |               |               |              |
|---|---------------|---------------|--------------|
| N | -0.0000000000 | 0.0000000000  | 0.0000000000 |
| C | 1.3943168701  | 0.0000000000  | 0.0000000000 |
| C | -0.6971584351 | -1.2075138304 | 0.0000000000 |
| C | -0.6971584351 | 1.2075138304  | 0.0000000000 |
| C | 2.0196953303  | -1.3136437071 | 0.0000000000 |
| C | -2.1474964870 | -1.0922856104 | 0.0000000000 |
| C | 0.1278011567  | 2.4059293175  | 0.0000000000 |
| N | 1.3797047458  | -2.4440919420 | 0.0000000000 |
| N | -2.8064980839 | 0.0271866114  | 0.0000000000 |
| N | 1.4267933381  | 2.4169053306  | 0.0000000000 |
| C | -0.0029504215 | -2.3888647060 | 0.0000000000 |
| C | -2.0673423109 | 1.1969874930  | 0.0000000000 |
| C | 2.0702927324  | 1.1918772130  | 0.0000000000 |
| H | 3.1047933775  | -1.3373701978 | 0.0000000000 |
| H | -2.7105932543 | -2.0201448396 | 0.0000000000 |
| H | -0.3942001232 | 3.3575150373  | 0.0000000000 |
| H | -0.5363847240 | -3.3282397792 | 0.0000000000 |
| H | -2.6141478367 | 2.1286426868  | 0.0000000000 |
| H | 3.1505325607  | 1.1995970924  | 0.0000000000 |

-----  
Z-MATRIX  
-----

geometry={

N1

C1 , N1 , R1  
C2 , N1 , R1 , C1 , 120.0  
C3 , N1 , R1 , C1 , 120.0 , C2 , 180.0  
C4 , C1 , R21 , N1 , A11 , C3 , 180.0  
C5 , C2 , R21 , N1 , A11 , C1 , 180.0  
C6 , C3 , R21 , N1 , A11 , C2 , 180.0  
N2 , N1 , R3 , C1 , A3 , C4 , 0.0  
N3 , N1 , R3 , C2 , A3 , C5 , 0.0  
N4 , N1 , R3 , C3 , A3 , C6 , 0.0  
C7 , C2 , R22 , N1 , A12 , C3 , 180.0  
C8 , C3 , R22 , N1 , A12 , C1 , 180.0  
C9 , C1 , R22 , N1 , A12 , C2 , 180.0  
H1 , C4 , R41 , C1 , A21 , N1 , 180.0  
H2 , C5 , R41 , C2 , A21 , N1 , 180.0  
H3 , C6 , R41 , C3 , A21 , N1 , 180.0

H4 , C7 , R42 , C2 , A22 , N1 , 180.0  
H5 , C8 , R42 , C3 , A22 , N1 , 180.0  
H6 , C9 , R42 , C1 , A22 , N1 , 180.0}

R1= 1.39431687 ANG  
R21= 1.45490825 ANG  
R22= 1.37022431 ANG  
R3= 2.80662976 ANG  
R41= 1.08535742 ANG  
R42= 1.08026741 ANG  
A11= 115.45743707 DEGREE  
A12= 119.55983802 DEGREE  
A21= 116.71005308 DEGREE  
A22= 119.96929245 DEGREE  
A3= 60.55500817 DEGREE

---

## References

- (1) Ricci, G.; San-Fabián, E.; Olivier, Y.; Sancho-García, J.-C. Singlet-triplet excited-state inversion in heptazine and related molecules: assessment of TD-DFT and ab initio methods. *ChemPhysChem* **2021**, *22*, 553–560.
- (2) Valverde, D.; Ser, C. T.; Ricci, G.; Jorner, K.; Pollice, R.; Aspuru-Guzik, A.; Olivier, Y. Computational Investigations of the Detailed Mechanism of Reverse Intersystem Crossing in Inverted Singlet–Triplet Gap Molecules. *ACS Appl. Mater. Interfaces* **2024**,
- (3) Tučková, L.; Straka, M.; Valiev, R. R.; Sundholm, D. On the origin of the inverted singlet–triplet gap of the 5th generation light-emitting molecules. *Phys. Chem. Chem. Phys* **2022**, *24*, 18713–18721.
- (4) Garner, M. H.; Blaskovits, J. T.; Corminboeuf, C. Double-bond delocalization in non-alternant hydrocarbons induces inverted singlet–triplet gaps. *Chemical Science* **2023**, *14*, 10458–10466.
- (5) Loos, P.-F.; Lipparini, F.; Jacquemin, D. Heptazine, Cyclazine, and Related Compounds: Chemically-Accurate Estimates of the Inverted Singlet–Triplet Gap. *J. Phys. Chem. Lett.* **2023**, *14*, 11069–11075.
- (6) Leupin, W.; Wirz, J. Low-lying electronically excited states of cycl [3.3. 3] azine, a bridged 12. pi.-perimeter. *J. Am. Chem. Soc.* **1980**, *102*, 6068–6075.
- (7) Terence Blaskovits, J.; Garner, M. H.; Corminboeuf, C. Symmetry-Induced Singlet-Triplet Inversions in Non-Alternant Hydrocarbons. *Angew. Chem. Int. Ed.* **2023**, *62*, e202218156.
- (8) Wilson, K. D.; Styers, W. H.; Wood, S. A.; Woods, R. C.; McMahon, R. J.; Liu, Z.; Yang, Y.; Garand, E. Spectroscopic Quantification of the Inverted Singlet–Triplet Gap in Pentaazaphenylene. *J. Am. Chem. Soc.* **2024**, *146*, 15688–15692.
- (9) Ehrmaier, J.; Rabe, E. J.; Pristash, S. R.; Corp, K. L.; Schlenker, C. W.; Sobolewski, A. L.; Domcke, W. Singlet–triplet inversion in heptazine and in polymeric carbon nitrides. *J. Phys. Chem. A* **2019**, *123*, 8099–8108.
